# Supplementary material
Source: publisher site journal article supplement (https://www.dovepress.com/article/397039)
Supplement: Supplementary file 1 [file get_supplementary_file.php]

**Supplementary Figure 1 Questionnaire on the perceptions, expectations and experiences of pain physicians regarding clinical pharmacy services**

**Section 1 Demographic profile, professional background and the frequency and intention of interacting with pharmacists (single choice)**

1. What is your age range(years)?

□ ≤ 35  □ ≤ 36–45  □ ≥ 46

2. What is your gender?

□ Male  □ Female

3. What is your education level?

□ Doctor     □ Master      □ Bachelor     □ Junior college

4. What is your department in your hospital?

□ Pain management □ Anesthesiology    □ Rehabilitation □ Orthopedics     □ Others

5. How many years of work experience do you have?

□ ≤ 5      □ ≤6–10      □ ≤11–20    □ ≥21

6. What kind of institution does your hospital belong to?

□ General    □ Specialized   □ Traditional Chinese medicine

7. What is the level of your hospital?

□ Tertiary     □ Secondary    □ Primary

8. What is your current job title?

□ Resident physician  □ Attending physician

□ Vice chief physician    □ Chief physician

9. What is the frequency of your interactions with clinical pharmacists?

□ Never or less than once a week

□ About once a week

□ Once daily or more

10. What is the reason for your interactions with the clinical pharmacist? (multiple-choice)

□ Drug availability queries

□ Drug alternative queries

□ Drug dosage queries

□ Side effects queries

□ Drug interaction queries

□ Other

**Section 2 Your perceptions about clinical pharmacy services (single choice)**

1. Providing patient education.

□ Comfortable

□ Uncomfortable

2. Suggesting use of non-prescription medications.

□ Comfortable

□ Uncomfortable

3. Suggesting use of prescription medications to patients.

□ Comfortable

□ Uncomfortable

4. Suggesting use of prescription medications to physicians.

□ Comfortable

□ Uncomfortable

5. Treating minor illnesses.

□ Comfortable

□ Uncomfortable

6. Designing and monitoring therapeutic regimes.

□ Comfortable

□ Uncomfortable

7. Monitoring outcomes of therapeutic regimes.

□ Comfortable

□ Uncomfortable

8. Detecting and preventing prescription errors.

□ Comfortable

□ Uncomfortable

**Section 3 Your expectations of clinical pharmacy services (single choice)**

1. I expect pharmacists to take personal responsibility for resolving any drug-related problems they discover involving patients.

□ Agree

□ Neutral

□ Disagree

2. I expect pharmacists to be knowledgeable drug therapy experts.

□ Agree

□ Neutral

□ Disagree

3. I expect pharmacists to assist me in designing drug therapy treatment plans for my patients.

□ Agree

□ Neutral

□ Disagree

4. I expect pharmacists to educate my patients about the safe and appropriate use of their medications.

□ Agree

□ Neutral

□ Disagree

5. I expect pharmacists to monitor my patients’ response to drug therapy and let me know if a patient encounters any drug-related problem.

□ Agree

□ Neutral

□ Disagree

6. I expect pharmacists to know the specific indication of each drug I prescribe, even when drugs have more than one approved or recognized indication.

□ Agree

□ Neutral

□ Disagree

7. I expect pharmacists to be available to me for consultation when I see patients (e.g. during rounds).

□ Agree

□ Neutral

□ Disagree

8. I expect pharmacists to assist my patients in selecting appropriate non-prescription medications.

□ Agree

□ Neutral

□ Disagree

**Section 4 Your experiences with clinical pharmacy services (single choice)**

1. In my experience, pharmacists are a reliable source of general drug information (information in standard references).

□ Agree

□ Neutral

□ Disagree

2. In my experience, pharmacists are a reliable source of clinical drug information (information regarding drug use in specific situations).

□ Agree

□ Neutral

□ Disagree

3. Pharmacists routinely educate my patients how to use their medications in a safe and appropriate way.

□ Agree

□ Neutral

□ Disagree

4. Pharmacists routinely inform me if they discover problems with my prescriptions.

□ Agree

□ Neutral

□ Disagree

5. Pharmacists routinely inform me about more cost-effective alternatives.

□ Agree

□ Neutral

□ Disagree

6. Pharmacists frequently ask me to clarify for them the pharmacotherapy objectives I have in mind.

□ Agree

□ Neutral

□ Disagree

7. Pharmacists frequently reminder me when my patients have encountered some problems with their medications.

□ Agree

□ Neutral

□ Disagree

8. In my experience, pharmacists appear willing to take personal responsibility for managing any drug-related problems.

□ Agree

□ Neutral

□ Disagree
